# Supplementary material for: Iocasia fonsfrigidae NS-1 gen. nov., sp. nov., a Novel Deep-Sea Bacterium Possessing Diverse Carbohydrate Metabolic Pathways
Source: Front Microbiol. 2021 Nov 24;12:725159. doi: 10.3389/fmicb.2021.725159 (PMC8652127; doi:10.3389/fmicb.2021.725159)
Supplement: Supplementary file 2 [file Table_2.XLSX]

## Sheet: Sheet1
gene_id	control_count	CMC_count	Rha_count	Lingin_count	glucose_count	CMC_fpkm	Rha_fpkm	control_fpkm	glucose_fpkm	Lingin_fpkm	CMCvscontrol_CMC	CMCvscontrol_control	CMCvscontrol_log2FoldChange	CMCvscontrol_pvalue	CMCvscontrol_padj	Rhavscontrol_Rha	Rhavscontrol_control	Rhavscontrol_log2FoldChange	Rhavscontrol_pvalue	Rhavscontrol_padj	Linginvscontrol_Lingin	Linginvscontrol_control	Linginvscontrol_log2FoldChange	Linginvscontrol_pvalue	Linginvscontrol_padj	glucosevscontrol_glucose	glucosevscontrol_control	glucosevscontrol_log2FoldChange	glucosevscontrol_pvalue	glucosevscontrol_padj	gene_name	gene_chr	gene_start	gene_end	gene_strand	gene_length	gene_biotype	gene_description	tf_family
GM661_00120 sucrose phosphorylase	27	18	163	41	53	4.74572	29.8629	7.43947	15.1112	9.01629	17.5592	27.6767	-0.652437	0.338487	0.962199	133.384	33.0094	2.01158	8.28e-05	0.000846146	36.2663	30.5268	0.248529	0.75059	0.901727	53.7418	26.6267	1.00967	0.0707751	0.168652	-	Chr1	25343	26797	+	1455	protein_coding	- && PF00128:Alpha amylase, catalytic domain	-
GM661_00225 alcohol dehydrogenase	1586	1042	84	279	56	381.78	21.3865	607.292	22.1885	85.2637	1016.6	1625.63	-0.677176	0.103994	0.746612	68.7303	1937.94	-4.81462	3.64e-22	7.96e-20	246.845	1792.54	-2.85964	1.72e-10	8.09e-09	56.7837	1564.14	-4.78072	2.12e-21	2.52e-19	-	Chr1	49083	50129	+	1047	protein_coding	- && PF00107:Zinc-binding dehydrogenase|PF08240:Alcohol dehydrogenase GroES-like domain	ADH_N
GM661_00890 [FeFe] hydrogenase HydF	1121	1128	1255	1036	1188	349.245	270.01	362.723	397.769	267.544	1100.5	1149.01	-0.0622171	0.883159	1	1027.08	1369.76	-0.415295	0.31841	0.51174	916.626	1266.99	-0.466916	0.26262	0.527605	1204.6	1105.55	0.123777	0.767572	0.88755	-	Chr1	158329	159567	+	1239	protein_coding	- && PF01926:50S ribosome-binding GTPase	-
GM661_01005 iron-containing alcohol dehydrogenase	873	719	828	881	1082	225.341	180.325	285.939	366.717	230.304	701.472	894.814	-0.351139	0.400462	0.981851	677.621	1066.73	-0.654494	0.117972	0.263083	779.484	986.693	-0.339999	0.414498	0.672204	1097.12	860.968	0.349644	0.402696	0.583055	-	Chr1	182049	183272	+	1224	protein_coding	- && PF00465:Iron-containing alcohol dehydrogenase	-
GM661_01325 zinc-binding alcohol dehydrogenase family protein	29	21	67	31	3	7.92119	17.5615	11.4319	1.22373	9.75321	20.4861	29.7267	-0.534148	0.368668	0.979658	54.8175	35.4532	0.62811	0.26047	0.449421	27.4185	32.7872	-0.255932	0.664878	0.849262	3.04312	28.5992	-3.18118	0.000154712	0.00104388	-	Chr1	252980	253996	+	1017	protein_coding	- && PF00107:Zinc-binding dehydrogenase|PF08240:Alcohol dehydrogenase GroES-like domain	ADH_N
GM661_02895 [FeFe] hydrogenase HydE	1615	1242	3180	1661	1771	457.681	814.298	621.961	705.754	510.535	1211.72	1655.35	-0.450034	0.278673	0.916728	2602.5	1973.38	0.399232	0.334614	0.528645	1469.62	1825.32	-0.312666	0.450919	0.699527	1795.75	1592.74	0.173059	0.676878	0.824311	-	Chr1	571881	572921	+	1041	protein_coding	- && PF04055:Radical SAM superfamily	Radical_SAM
GM661_03045 alpha-galactosidase	110	54	41	5004	17	9.29343	4.90321	19.7844	3.16391	718.314	52.6817	112.75	-1.09586	0.0244677	0.406873	33.539	134.427	-1.9981	6.72e-05	0.000707304	4427.45	124.335	5.1529	5.73e-25	2.37e-22	17.2387	108.483	-2.64509	1.26e-06	1.36e-05	-	Chr1	609563	611791	+	2229	protein_coding	- && PF16874:Glycosyl hydrolase family 36 C-terminal domain|PF02065:Melibiase|PF16875:Glycosyl hydrolase family 36 N-terminal domain	-
GM661_03055 alpha-glucosidase/alpha-galactosidase	280	268	402	3829	345	69.0914	72.0162	75.4391	96.1838	823.359	261.465	286.998	-0.134337	0.758533	1	328.982	342.149	-0.0564494	0.90338	0.989302	3387.83	316.473	3.41975	6.95e-14	6.15e-12	349.822	276.14	0.341074	0.428333	0.613523	-	Chr1	612947	614434	+	1488	protein_coding	- && PF11975:Family 4 glycosyl hydrolase C-terminal domain|PF02056:Family 4 glycosyl hydrolase	-
GM661_04520 peptidoglycan-binding domain-containing protein	87	84	126	1338	49	8.41782	8.77416	9.11147	5.31019	111.838	81.9504	89.1758	-0.121653	0.828066	1	103.103	106.323	-0.043851	0.951775	1	1183.83	98.34	3.58804	3.12e-14	3.05e-12	49.6859	85.7998	-0.786667	0.116887	0.242872	-	Chr1	937065	940892	+	3828	protein_coding	- && PF07523:Bacterial Ig-like domain (group 3)|PF13229:Right handed beta helix region	-
GM661_05035 zinc-binding alcohol dehydrogenase family protein	1087	432	1154	476	117	165.39	307.005	434.914	48.44	152.001	421.468	1114.16	-1.40219	0.000986679	0.0533795	944.42	1328.22	-0.491893	0.237724	0.426893	421.147	1228.56	-1.54425	0.000301268	0.00300218	118.636	1072.02	-3.17438	6.78e-12	1.86e-10	-	Chr1	1064965	1065966	+	1002	protein_coding	- && PF00107:Zinc-binding dehydrogenase|PF08240:Alcohol dehydrogenase GroES-like domain	ADH_N
GM661_05045 zinc-binding alcohol dehydrogenase family protein	251	77	290	102	21	28.7896	75.3456	98.0771	8.49098	31.8097	75.121	257.273	-1.77426	0.000118565	0.0101539	237.321	306.714	-0.369705	0.39745	0.591622	90.2382	283.696	-1.65098	0.000281861	0.00285471	21.2946	247.54	-3.53147	1.66e-11	4.31e-10	-	Chr1	1067334	1068359	+	1026	protein_coding	- && PF08240:Alcohol dehydrogenase GroES-like domain|PF00107:Zinc-binding dehydrogenase	ADH_N
GM661_06035 NAD(P)-dependent alcohol dehydrogenase	4662	6432	12460	9413	17038	2329.93	3136.38	1764.89	6674.34	2844.06	6275.21	4778.48	0.393105	0.339944	0.963218	10197.3	5696.49	0.840031	0.0423234	0.126022	8328.46	5269.1	0.660485	0.109588	0.307425	17276.1	4597.75	1.90975	6.89e-06	6.24e-05	-	Chr1	1268018	1269076	+	1059	protein_coding	- && PF00107:Zinc-binding dehydrogenase|PF08240:Alcohol dehydrogenase GroES-like domain	ADH_zinc_N
GM661_06160 [FeFe] hydrogenase HydG	2221	1404	3672	1330	707	384.434	698.669	635.553	209.347	303.753	1369.77	2276.49	-0.732819	0.0778164	0.658929	3005.16	2713.85	0.147112	0.722011	0.861456	1176.75	2510.23	-1.09291	0.00892112	0.0487644	716.881	2190.39	-1.61122	0.000149262	0.00101641	-	Chr1	1290773	1292173	-	1401	protein_coding	- && PF04055:Radical SAM superfamily|PF06968:Biotin and Thiamin Synthesis associated domain	Radical_SAM
GM661_06165 [FeFe] hydrogenase HydE	1615	1153	3267	672	518	415.31	817.724	607.945	201.774	201.895	1124.89	1655.35	-0.557295	0.180177	0.872111	2673.7	1973.38	0.43817	0.289655	0.479193	594.565	1825.32	-1.61801	0.000143905	0.00160148	525.24	1592.74	-1.60024	0.000172523	0.00114932	-	Chr1	1292192	1293256	-	1065	protein_coding	- && PF04055:Radical SAM superfamily	Radical_SAM
GM661_06170 [FeFe] hydrogenase system regulator	458	370	976	156	176	556.614	1020.27	720.056	286.324	195.745	360.979	469.445	-0.378912	0.376498	0.979658	798.745	559.646	0.5132	0.222759	0.410681	138.016	517.652	-1.90606	1.68e-05	0.000244369	178.461	451.687	-1.33912	0.00222158	0.0107265	-	Chr1	1293258	1293512	-	255	protein_coding	- && -	-
GM661_06475 polysaccharide deacetylase	71	65	1302	333	51	20.6756	287.787	23.6022	17.5432	88.3494	63.4135	72.776	-0.198219	0.69034	1	1065.54	86.7729	3.61666	3.05e-14	2.22e-12	294.623	80.2565	1.8748	4.84e-05	0.000633708	51.7139	70.0204	-0.43637	0.407389	0.587644	-	Chr1	1363820	1365025	-	1206	protein_coding	- && PF01476:LysM domain|PF01522:Polysaccharide deacetylase	Polysacc_deac_1
GM661_06995 glycosyltransferase	3	5	4	7	151	2.64196	1.46869	1.65663	86.2831	3.08509	4.87604	3.07709	0.644783	0.746295	1	3.25746	3.68391	-0.157623	1	1	6.18349	3.40154	0.845952	0.54333	0.76009	153.111	2.95747	5.63497	3.14e-15	1.5e-13	-	Chr1	1469003	1469728	+	726	protein_coding	- && PF00535:Glycosyl transferase family 2	Glycos_transf_2
GM661_08065 cellodextrinase	42	487	258	108	81	73.2624	26.9704	6.60314	13.1774	13.5516	475.127	43.0515	3.46045	1.84e-12	1.69e-09	211.132	51.3379	2.03807	2.67e-05	0.000317469	95.5469	47.4801	1.00747	0.0433388	0.16008	82.1331	41.42	0.985421	0.0490247	0.127457	-	Chr1	1685532	1688081	+	2550	protein_coding	- && PF02927:N-terminal ig-like domain of cellulase|PF06452:Carbohydrate family 9 binding domain-like|PF00759:Glycosyl hydrolase family 9	-
GM661_08070 glycosyl transferase	127	765	493	157	199	124.613	55.8037	21.6199	35.0548	21.3312	746.351	130.175	2.51828	2.38e-08	6.71e-06	403.457	155.199	1.37782	0.00179965	0.0107258	138.901	143.549	-0.0472305	0.926955	1	201.782	125.249	0.687436	0.123232	0.251934	-	Chr1	1688116	1690470	+	2355	protein_coding	- && PF06165:Glycosyltransferase family 36	-
GM661_08075 glycosyl transferase	110	1008	572	160	319	159.128	62.7476	18.1479	54.459	21.0679	983.427	112.75	3.1233	1.43e-11	8.78e-09	468.11	134.427	1.79934	5.86e-05	0.000626537	141.556	124.335	0.187185	0.679688	0.856407	323.459	108.483	1.57499	0.000437011	0.00263063	-	Chr1	1690501	1692930	+	2430	protein_coding	- && PF06165:Glycosyltransferase family 36	-
GM661_09565 phosphate acetyltransferase	1089	1558	2097	1193	4290	603.705	564.638	440.995	1797.66	385.578	1520.02	1116.21	0.445444	0.284091	0.918976	1716.17	1330.66	0.367054	0.376751	0.572594	1055.54	1230.82	-0.221594	0.595231	0.803644	4349.95	1073.99	2.01789	2.39e-06	2.44e-05	-	Chr1	2005233	2006222	+	990	protein_coding	- && PF01515:Phosphate acetyl/butaryl transferase	-
GM661_09570 acetate/propionate family kinase	1113	1583	2448	1546	4224	506.048	543.798	371.839	1460.25	412.226	1544.41	1140.81	0.436962	0.293243	0.929885	2003.43	1359.99	0.55887	0.178353	0.348375	1367.87	1257.95	0.120867	0.77245	0.91996	4283.03	1097.66	1.96408	4.24e-06	4.1e-05	-	Chr1	2006241	2007440	+	1200	protein_coding	- && PF00871:Acetokinase family	-
GM661_10570 peptidoglycan-binding domain-containing protein	2	0	54	4	5	0	27.2626	1.51858	3.92845	2.424	1.39e-17	2.05212	-4.12141	0.509804	0.993181	44.1782	2.46213	4.11006	1.26e-06	2.19e-05	3.52905	2.27139	0.619413	0.704873	0.871305	5.07106	1.97124	1.30847	0.483528	0.665193	-	Chr1	2197835	2198362	-	528	protein_coding	- && PF01476:LysM domain	LysM
GM661_12235 iron-containing alcohol dehydrogenase	11758	17141	7483	22435	74816	5693.07	1727.03	4081.24	26871.9	6215.14	16723.2	12051.8	0.4726	0.250722	0.913957	6124.08	14367.1	-1.23018	0.00315267	0.0166545	19850.1	13289.1	0.578896	0.159839	0.38908	75861.5	11596	2.70973	5.65e-10	1.14e-08	-	Chr1	2537363	2538517	-	1155	protein_coding	- && PF00465:Iron-containing alcohol dehydrogenase	-
GM661_12905 iron-containing alcohol dehydrogenase	77	119	111	380	578	39.9386	25.8871	27.0076	209.782	106.376	116.097	78.9259	0.556096	0.243274	0.911927	90.8272	94.1043	-0.0505424	0.946198	1	336.208	87.0378	1.94834	2.2e-05	0.000310343	586.078	75.9377	2.94612	3.15e-10	6.66e-09	-	Chr1	2684902	2686044	-	1143	protein_coding	- && PF00465:Iron-containing alcohol dehydrogenase	-
GM661_13985 6-phospho-beta-glucosidase	11	25	124	228	48	6.7159	23.1473	3.0882	13.9444	51.0874	24.3886	11.2769	1.10469	0.116302	0.777066	101.466	13.459	2.90517	8.6e-07	1.55e-05	201.721	12.4432	4.00681	2.33e-12	1.44e-10	48.6719	10.8472	2.15275	0.000619733	0.00361726	-	Chr1	2905203	2906630	-	1428	protein_coding	- && PF00232:Glycosyl hydrolase family 1	Glyco_hydro_1
GM661_14045 spore cortex-lytic enzyme	3	5	1	19	2	2.87997	0.400251	1.80588	1.24578	9.12822	4.87604	3.07709	0.644783	0.746295	1	0.802108	3.68391	-2.00935	0.398816	0.591622	16.801	3.40154	2.26852	0.0230709	0.101364	2.02915	2.95747	-0.51833	1	1	-	Chr1	2918598	2919263	-	666	protein_coding	- && PF01471:Putative peptidoglycan binding domain|PF07486:Cell Wall Hydrolase	PG_binding_1
GM661_14165 iron hydrogenase	5	1	19	7	0	0.278585	3.67813	1.45572	0	1.62656	0.9735	5.12704	-2.25401	0.245788	0.911927	15.5339	6.12762	1.33044	0.10544	0.244623	6.18349	5.66192	0.129502	1	1	1.39e-17	4.92992	-5.33816	0.0751017	0.175222	-	Chr1	2944347	2945723	+	1377	protein_coding	- && PF02906:Iron only hydrogenase large subunit, C-terminal domain|PF00037:4Fe-4S binding domain	Fe_hyd_lg_C
GM661_14245 xylanase	41	43	75	308	14	14.2817	17.3096	14.2312	5.02842	85.3249	41.9498	42.0265	-0.00248468	1	1	61.3647	50.116	0.292381	0.565001	0.739352	272.504	46.3499	2.55283	1.4e-07	3.25e-06	14.1968	40.4338	-1.50196	0.0152297	0.0510522	-	Chr1	2964840	2965994	-	1155	protein_coding	- && PF01270:Glycosyl hydrolases family 8	-
GM661_14250 alpha-glucuronidase	50	49	128	516	60	9.09385	16.5073	9.69774	12.0419	79.876	47.8035	51.2513	-0.100098	0.907785	1	104.74	61.1131	0.776701	0.115949	0.260867	456.538	56.5218	3.01139	3.04e-10	1.3e-08	60.8396	49.3098	0.302385	0.55903	0.723381	-	Chr1	2966148	2968214	-	2067	protein_coding	- && PF03648:Glycosyl hydrolase family 67 N-terminus|PF07488:Glycosyl hydrolase family 67 middle domain|PF07477:Glycosyl hydrolase family 67 C-terminus	-
GM661_14260 glycosyl hydrolase	39	40	162	1001	59	6.98747	19.6648	7.11989	11.1456	145.851	39.0229	39.9765	-0.0345696	1	1	132.566	47.6722	1.47384	0.00295504	0.0159735	885.658	44.0894	4.32476	9.05e-18	1.34e-15	59.8256	38.4614	0.635613	0.216267	0.374226	-	Chr1	2970171	2972366	-	2196	protein_coding	- && PF00933:Glycosyl hydrolase family 3 N terminal domain|PF14310:Fibronectin type III-like domain|PF01915:Glycosyl hydrolase family 3 C-terminal domain	Glyco_hydro_3_C
GM661_15520 6-phospho-beta-glucosidase	2008	1638	369	19737	2298	447.548	70.0594	573.374	678.998	4498.02	1598.07	2058.17	-0.365004	0.378357	0.979658	301.975	2453.58	-3.02179	1.72e-11	7.81e-10	17463	2269.49	2.94379	2.7e-11	1.52e-09	2330.11	1980.33	0.234648	0.570752	0.734935	-	Chr1	3247246	3248649	-	1404	protein_coding	- && PF02056:Family 4 glycosyl hydrolase|PF11975:Family 4 glycosyl hydrolase C-terminal domain	-
GM661_16185 helix-turn-helix domain-containing protein	37	41	316	62	45	6.3625	34.0758	6.0006	7.55179	8.02509	39.9985	37.9265	0.0766479	0.943888	1	258.6	45.2284	2.51287	3.04e-07	6.17e-06	54.8468	41.829	0.39052	0.478493	0.724855	45.63	36.4889	0.321455	0.542113	0.70779	-	Chr1	3369158	3371629	-	2472	protein_coding	- && PF01229:Glycosyl hydrolases family 39|PF12833:Helix-turn-helix domain	Glyco_hydro_39
GM661_16640 peptidoglycan-binding domain-containing protein	0	2	7	1	2	1.41294	3.43641	0	1.52797	0.58926	1.94913	1.39e-17	4.05439	0.509804	0.993181	5.71284	1.39e-17	5.57755	0.0409646	0.12296	--	--	--	--	--	2.02915	1.39e-17	4.10644	0.509804	0.677648	-	Chr1	3468010	3468552	+	543	protein_coding	- && PF01476:LysM domain|PF03734:L,D-transpeptidase catalytic domain	LysM
GM661_17520 aldo/keto reductase	79	191	21	168	7	68.6048	5.24149	29.6549	2.71902	50.3321	186.342	80.9759	1.20119	0.00925232	0.236457	17.1708	96.5481	-2.48128	4.8e-06	7.05e-05	148.634	89.2983	0.734529	0.115876	0.320265	7.099	77.9101	-3.43351	8.61e-08	1.14e-06	-	Chr1	3658587	3659654	-	1068	protein_coding	- && PF00248:Aldo/keto reductase family	Aldo_ket_red
